# Supplementary material for: Aptasensor for label-free square-wave voltammetry detection of potassium ions based on gold nanoparticle amplification
Source: Royal Society of Chemistry journal article supplement (doi:10.1039/c4ra05058d), 2014-09-26
Supplement: c4ra05058d1.pdf [file c4ra05058d1.pdf]

## **Supporting information**

### **Aptasensor for label-free square-wave voltammetry detection of potassium ion based on gold nanoparticles amplification**

**Zhengbo Chen,\* Tianhui Zhou, Chenmeng Zhang, He Ma, Yuqing Lin and Kai Li**

**Department of Chemistry, Capital Normal University, Beijing, 100048, China**

**\* Corresponding author. Tel.: 010-68903047**

**E-mail: [czb979216@sina.com](mailto:czb979216@sina.com)**

**Table S1.**

Relative standard deviations at specific concentrations of  $K^+$  using the aptamer/gold electrode (n=4)

| C       | 50 nM | 0.1 $\mu$ M | 0.5 $\mu$ M | 1 $\mu$ M | 5 $\mu$ M | 10 $\mu$ M | 50 $\mu$ M | 0.1 mM |
|---------|-------|-------------|-------------|-----------|-----------|------------|------------|--------|
| RSD (%) | 1.01  | 1.00        | 0.84        | 1.11      | 1.01      | 1.15       | 1.31       | 1.77   |

Relative standard deviations at specific concentrations of  $K^+$  using the aptamer/AuNP/*p*-ATP/gold electrode to  $K^+$  (n=4)

| C       | 10   | 50   | 0.1  | 0.5  | 1    | 5    | 10   | 50   | 0.1     | 0.5     | 1       | 5       | 10      | 50      | 0.1  | 0.5  | 1    |
|---------|------|------|------|------|------|------|------|------|---------|---------|---------|---------|---------|---------|------|------|------|
|         | pM   | pM   | nM   | nM   | nM   | nM   | nM   | nM   | $\mu$ M | mM   | mM   | mM   |
| RSD (%) | 2.00 | 2.99 | 2.02 | 2.00 | 3.51 | 3.84 | 2.85 | 4.51 | 4.30    | 2.98    | 3.80    | 3.73    | 3.00    | 4.30    | 3.31 | 4.98 | 4.16 |

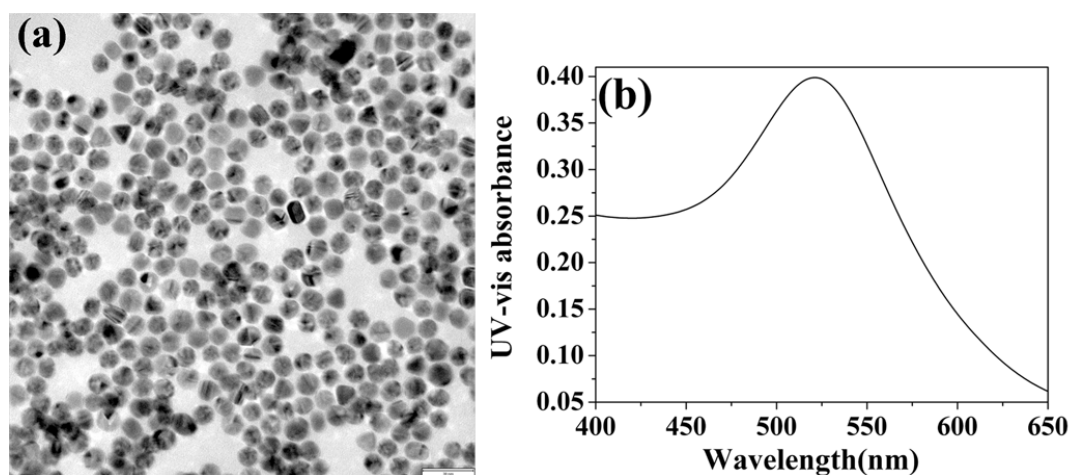

**Fig. S1** (A) Typical TEM images and (B) absorption spectrum of the AuNPs prepared in this work. Scale bar in (A) is 50 nm.

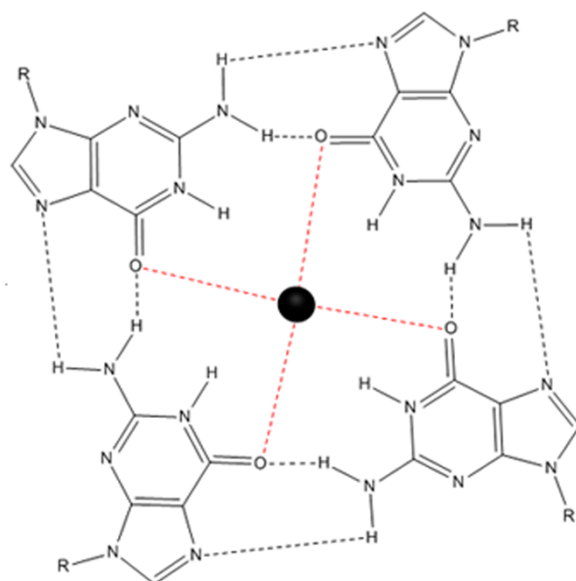

**Fig. S2**  $K^+$ -induced a secondary structure, G-quadruplex.

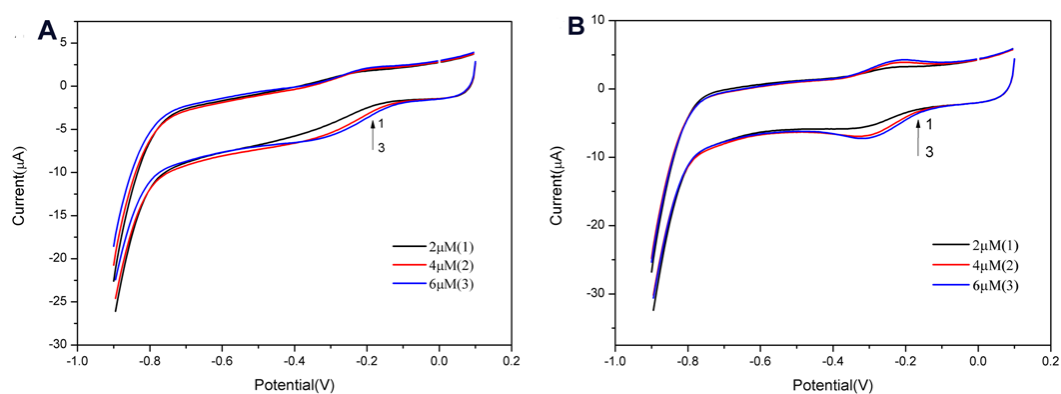

**Fig. S3** CVs obtained from (A) DNA /gold electrode and (B) DNA/AuNPs/p-ATP/gold electrode in 10mM Tris buffer (pH 7.40) in the presence of  $[Ru(NH_3)_6]^{3+}$  at different concentrations (1) 2  $\mu$ M, (2) 4  $\mu$ M, (3) 6  $\mu$ M.

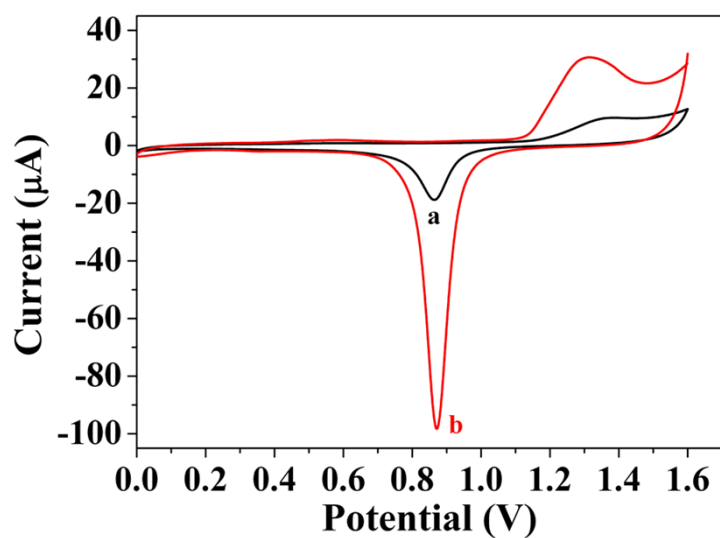

**Fig. S4** CVs of (a) bare gold electrode and (b) AuNPs/gold electrode in 0.5 M H<sub>2</sub>SO<sub>4</sub>, scan rate was 50 mV/s.

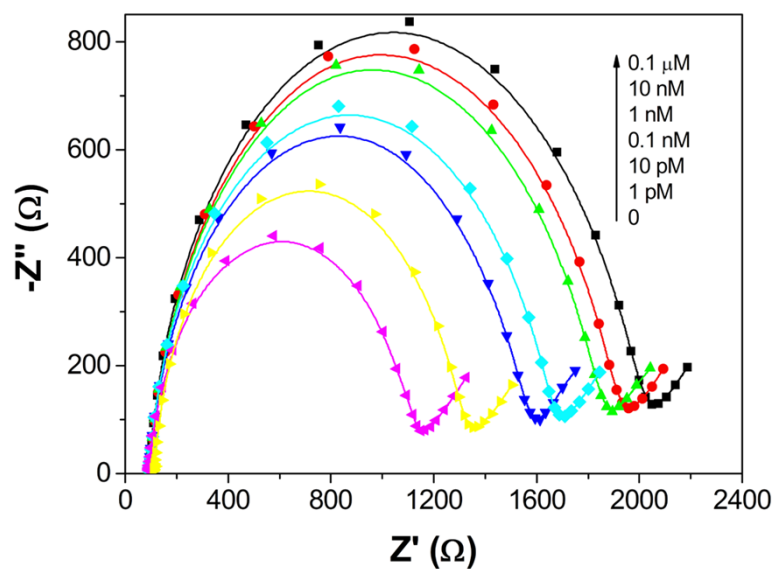

**Fig. S5** The Nyquist plots of aptamer/AuNP/gold electrode for K<sup>+</sup> with different concentrations were obtained in 20 mM Tris-HCl buffer containing 1 mM Na<sub>3</sub>Fe(CN)<sub>6</sub>-1 mM Na<sub>4</sub>Fe(CN)<sub>6</sub> (pH 7.40).

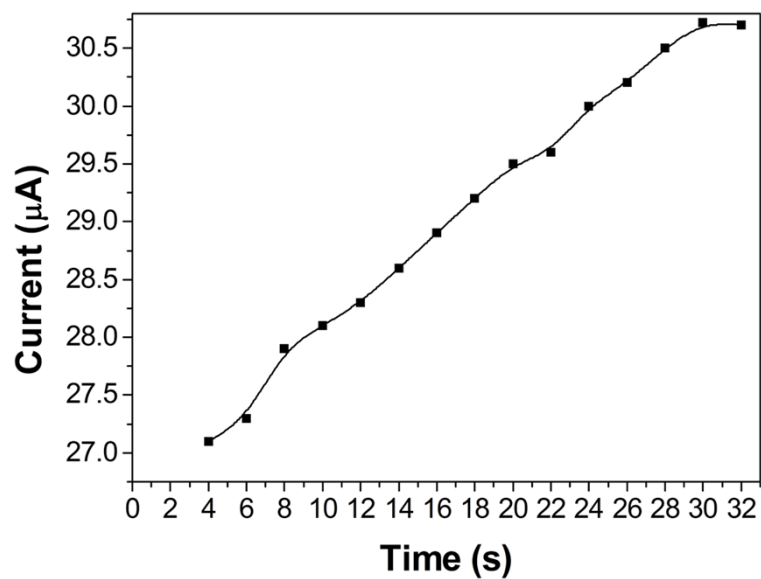

**Fig. S6** Time dependence of SWV peak current. The electrochemical measurements were carried out in 20 mM Tris-HCl buffer containing 1 mM  $\text{Na}_3\text{Fe}(\text{CN})_6$ -1 mM  $\text{Na}_4\text{Fe}(\text{CN})_6$  (pH 7.40), including 1 pM  $\text{K}^+$ .
